# Supplementary material for: The modern morphometric approach to identify eggs of Triatominae
Source: PubMed Central journal article supplement (PMC5286694; doi:10.1186/s13071-017-1982-2), 2017-01-31
Supplement: 13071_2017_1982_MOESM1_ESM.pdf [file 13071_2017_1982_MOESM1_ESM.pdf]

1 **Additional file 1. Table S1.** Reclassification score of head and wing of *Panstrongylus*  
2 *chinai* and *Panstrongylus howardi*.

3

| Species           | Head   |      | Wings  |      |
|-------------------|--------|------|--------|------|
|                   | Female | Male | Female | Male |
| <i>P. chinai</i>  | 77%    | 80%  | 66%    | 92%  |
| <i>P. howardi</i> | 73%    | 76%  | 93%    | 85%  |

4

5 *P. Panstrongylus*

6 The sample sizes for heads and wings were the same, 18 *P. chinai* versus 15 *P. howardi* in  
7 females, and 25 *P. chinai* versus 21 *P. howardi* in males. *P. chinai* was collected in the  
8 Loja province of Ecuador, *P. howardi* is endemic to the Manabí province of Ecuador.

9
